# Supplementary material
Source: PubMed Central journal article supplement (PMC6008212)

A

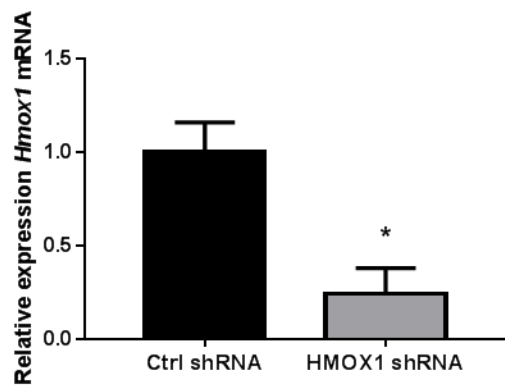

B

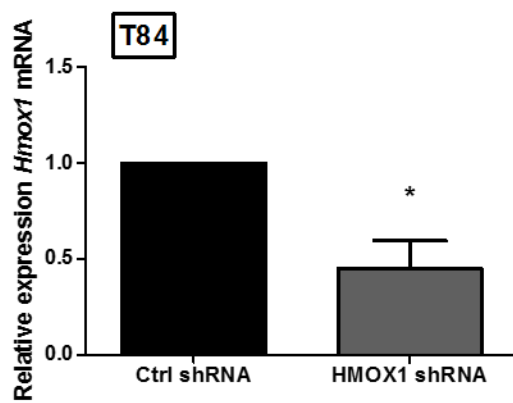

Supplement: NIHMS957347-supplement-supplement_1.pdf [file NIHMS957347-supplement-supplement_1.pdf]
